# Supplementary material for: Fibre Bragg Grating Based Interface Pressure Sensor for Compression Therapy
Source: MDPI journal article supplement (doi:10.3390/s22051798), 2022-02-24
Supplement: s1 [file s1]

## Article

# Supplementary Data: Fibre Bragg Grating Based Interface Pressure Sensor for Compression Therapy

James A. Bradbury <sup>1,†</sup>, Qimei Zhang <sup>2,†</sup>, Francisco U. Hernandez Ledezma <sup>3,†</sup>, Ricardo Correia <sup>1</sup>, Serhiy Korposh <sup>1</sup>,  
Barrie R. Hayes-Gill <sup>1</sup>, Ferdinand Tamoué <sup>4</sup>, Alison Parnham <sup>5</sup>, Simon A. McMaster <sup>3</sup> and Stephen P. Morgan <sup>1,3,\*</sup>

<sup>1</sup> Optics and Photonics Group, Faculty of Engineering, University of Nottingham, Nottingham NG7 2RD, UK; james.bradbury@nottingham.ac.uk (J.A.B.); ricardo.goncalvescorreia@nottingham.ac.uk (R.C.); s.korposh@nottingham.ac.uk (S.K.); barrie.hayes-gill@nottingham.ac.uk (B.R.H.-G.)

<sup>2</sup> Department of Engineering, School of Science and Technology, Nottingham Trent University Nottingham, Nottingham NG1 4FQ, UK; qimei.zhang@ntu.ac.uk

<sup>3</sup> Footfalls and Heartbeats (UK) Limited, 10 Castle Quay, Castle Boulevard, Nottingham NG7 1FW, UK; ulises@footfallsandheartbeats.com (F.U.H.L.), simon@footfallsandheartbeats.com (S.A.M.)

<sup>4</sup> KOB GmbH, Lauterstraße 50, 67752 Wolfstein, Germany; ferdinand.tamoue@kob.de

<sup>5</sup> School of Health Sciences, University of Nottingham, Nottingham NG7 2RD, UK; alison.parnham@nottingham.ac.uk

\* Correspondence: steve.morgan@nottingham.ac.uk

† These authors contributed equally to this work.

**Citation:** Bradbury, J.A.; Zhang, Q.; Hernandez Ledezma, F.U.; Correia, R.; Korposh, S.; Hayes-Gill, B.R.; Tamoué, F.; Parnham, A.; McMaster, S.A.; Morgan, S.P. Fibre Bragg Grating Based Interface Pressure Sensor for Compression Therapy. *Sensors* **2022**, *22*, 1798. <https://doi.org/10.3390/s22051798>

Academic Editors: Thomas Geernaert, Jeroen Missinne and Geert Van Steenberge

Received: 14 January 2022

Accepted: 22 February 2022

Published: 24 February 2022

**Publisher's Note:** MDPI stays neutral with regard to jurisdictional claims in published maps and institutional affiliations.

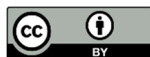

**Copyright:** © 2022 by the authors. Licensee MDPI, Basel, Switzerland. This article is an open access article distributed under the terms and conditions of the Creative Commons Attribution (CC BY) license (<https://creativecommons.org/licenses/by/4.0/>).

## Figures S1 – S9

Calibration data showing wavelength shift against mass for the ten sensors. This was done using the method described in section 2.3.1 of the main paper.

## Figures S10 – S16

Graphs showing the response of the sensor using a blood pressure cuff as described in section 2.3.3 of the main paper.

## Figures S17 – S20

Graphs showing the response of the sensor compared to the response of the gold standard sensor when used under a compression bandage, using the method as described in section 2.4.2 of the main paper.

Note that in figures S19 and S20 a two layer bandage system was used.

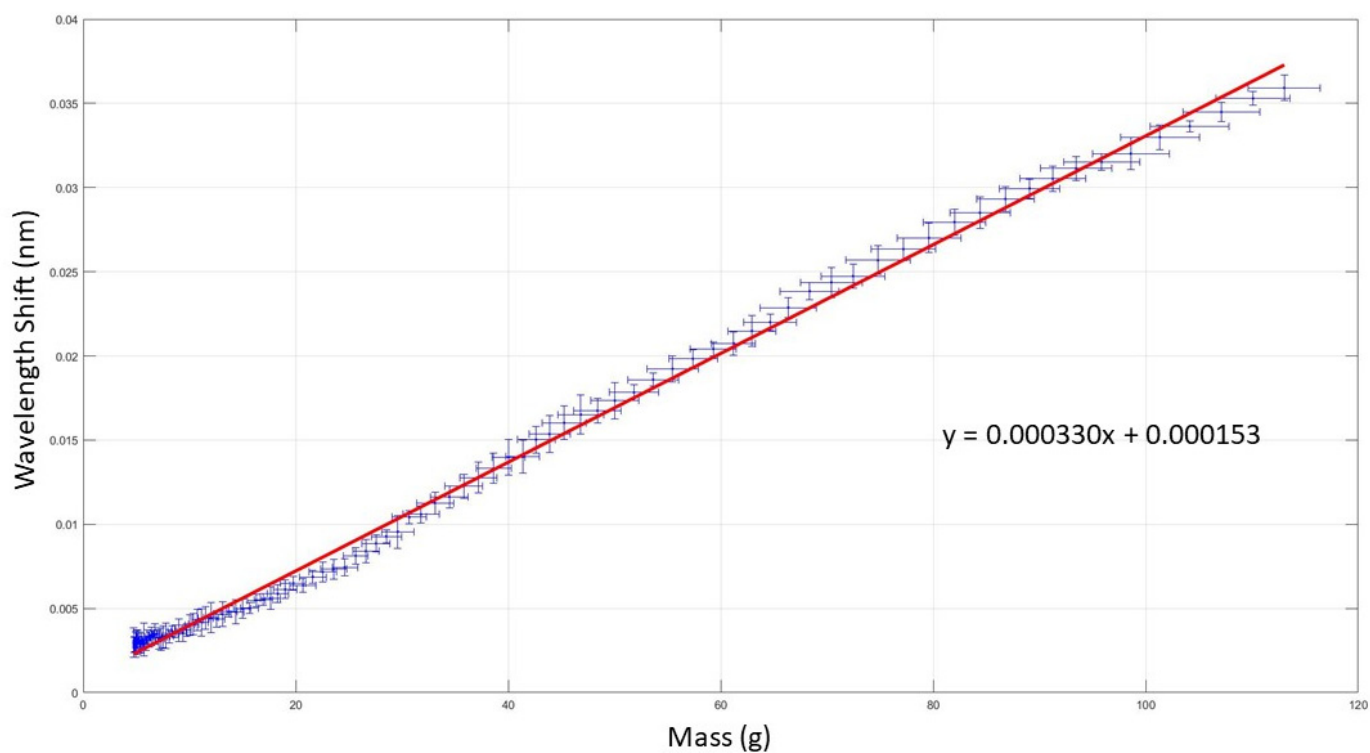

Figure S1 Calibration Data 2

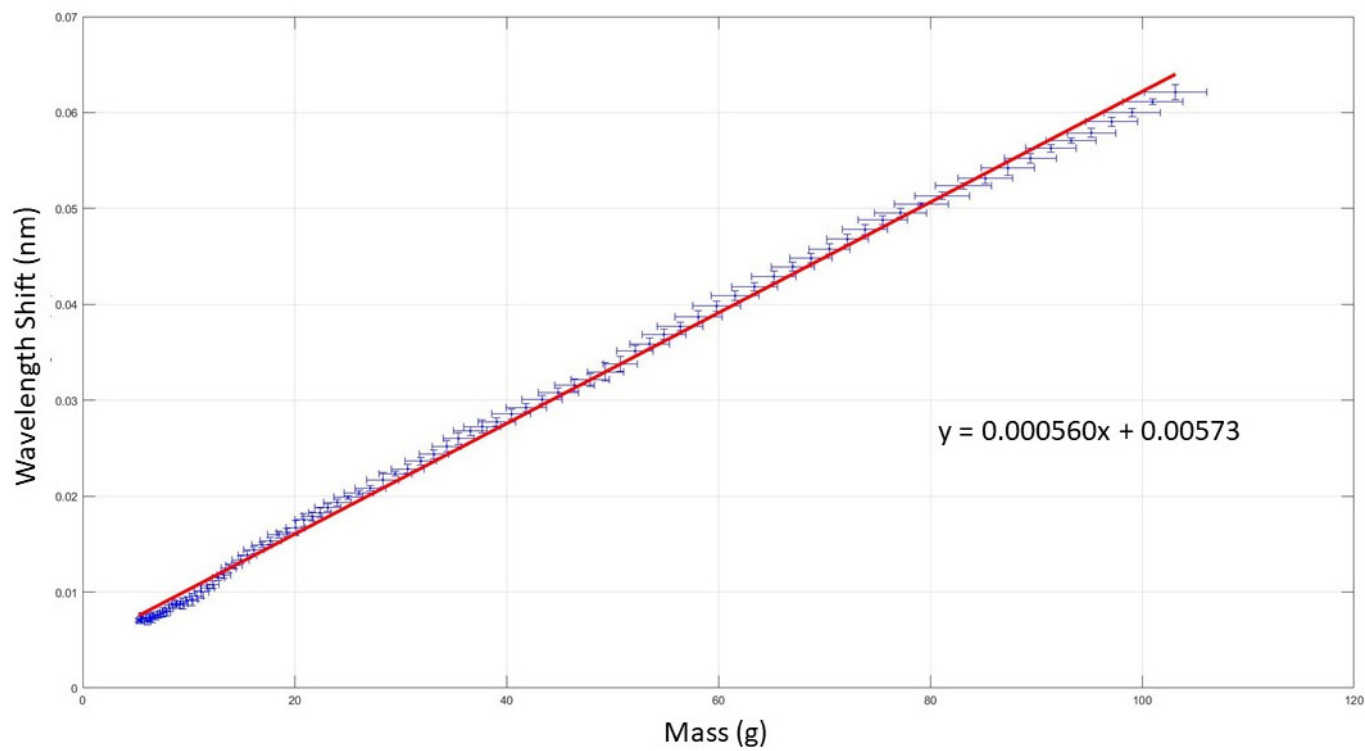

Figure S2 Calibration Data 3

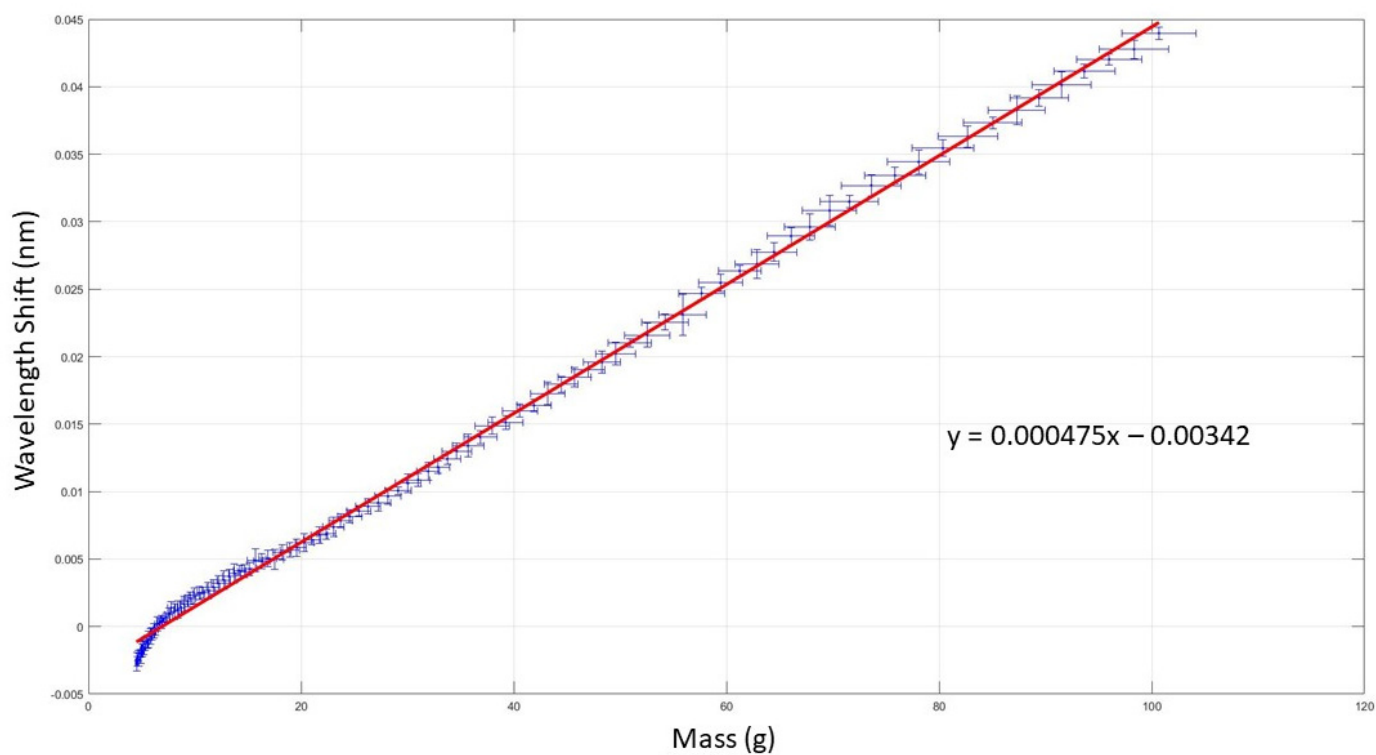

Figure S3 Calibration Data 4

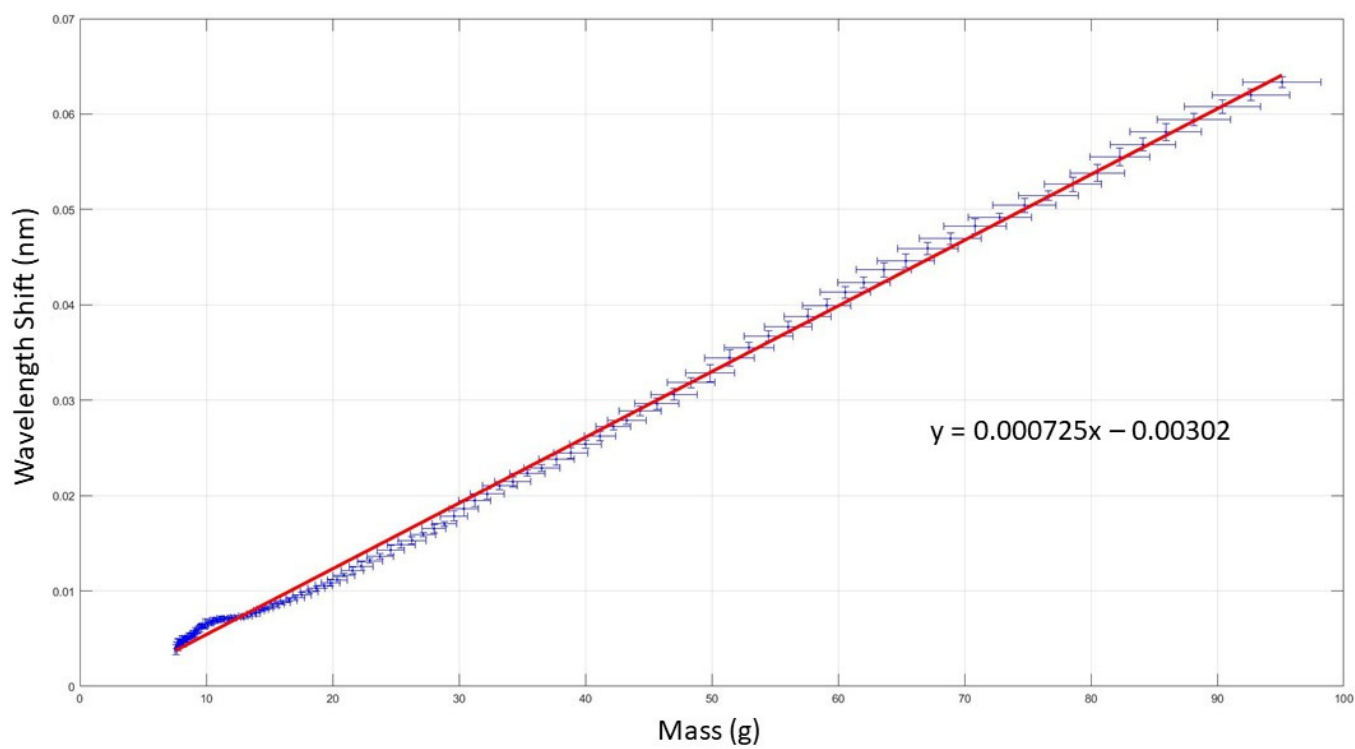

Figure S4 Calibration Data 5

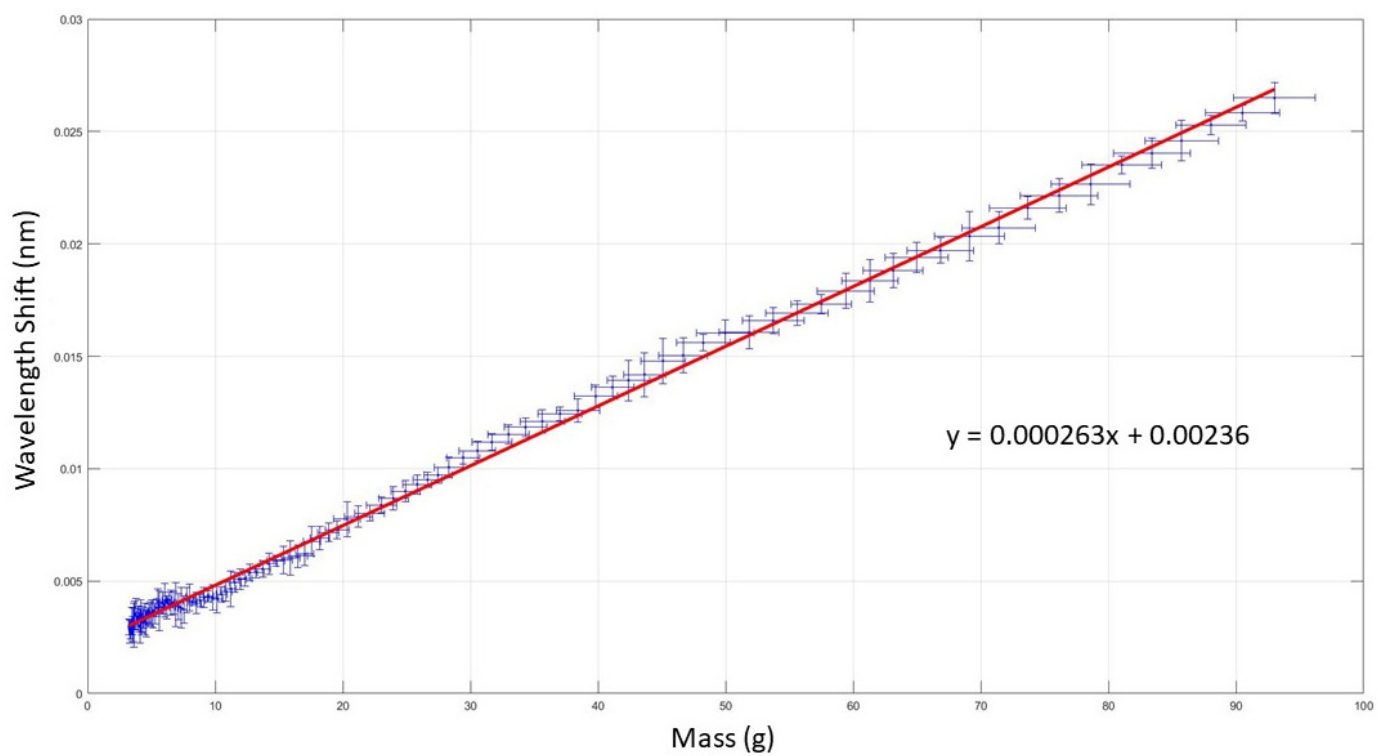

Figure S5 Calibration Data 6

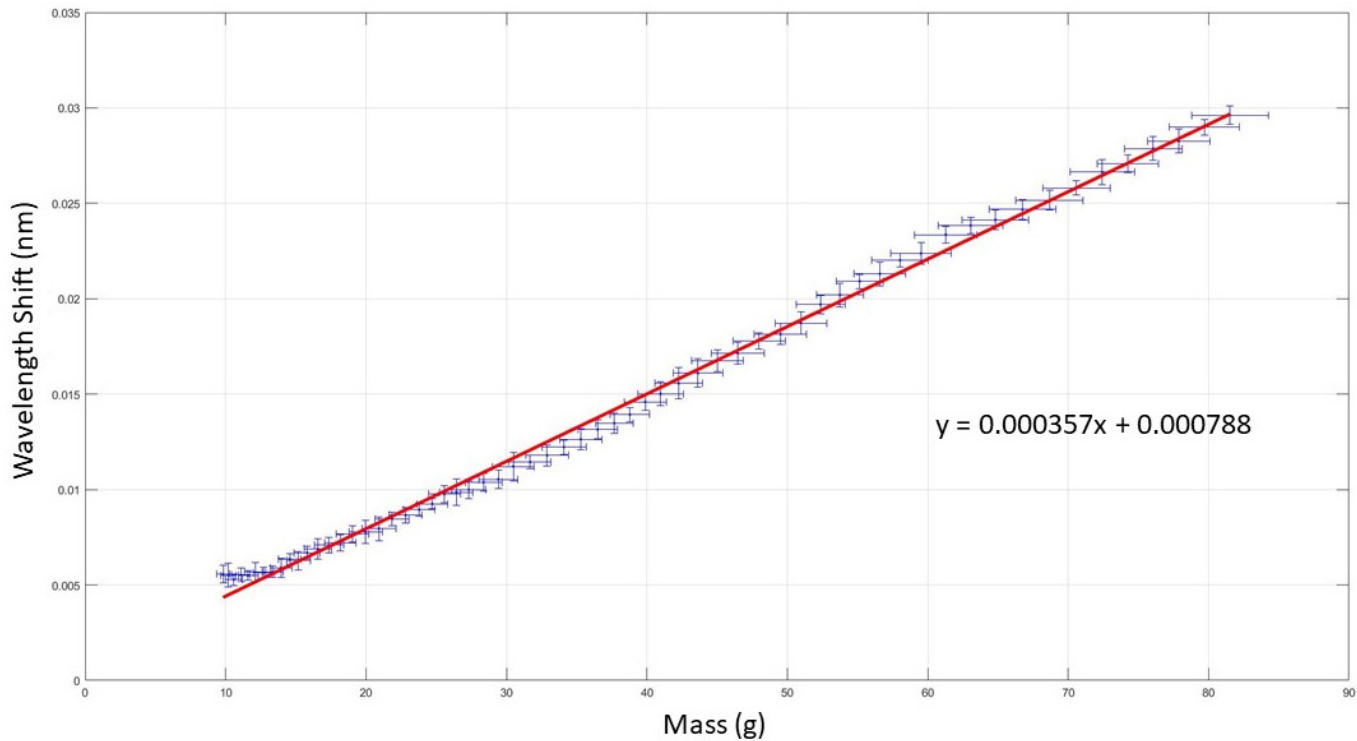

Figure S6 Calibration Data 7

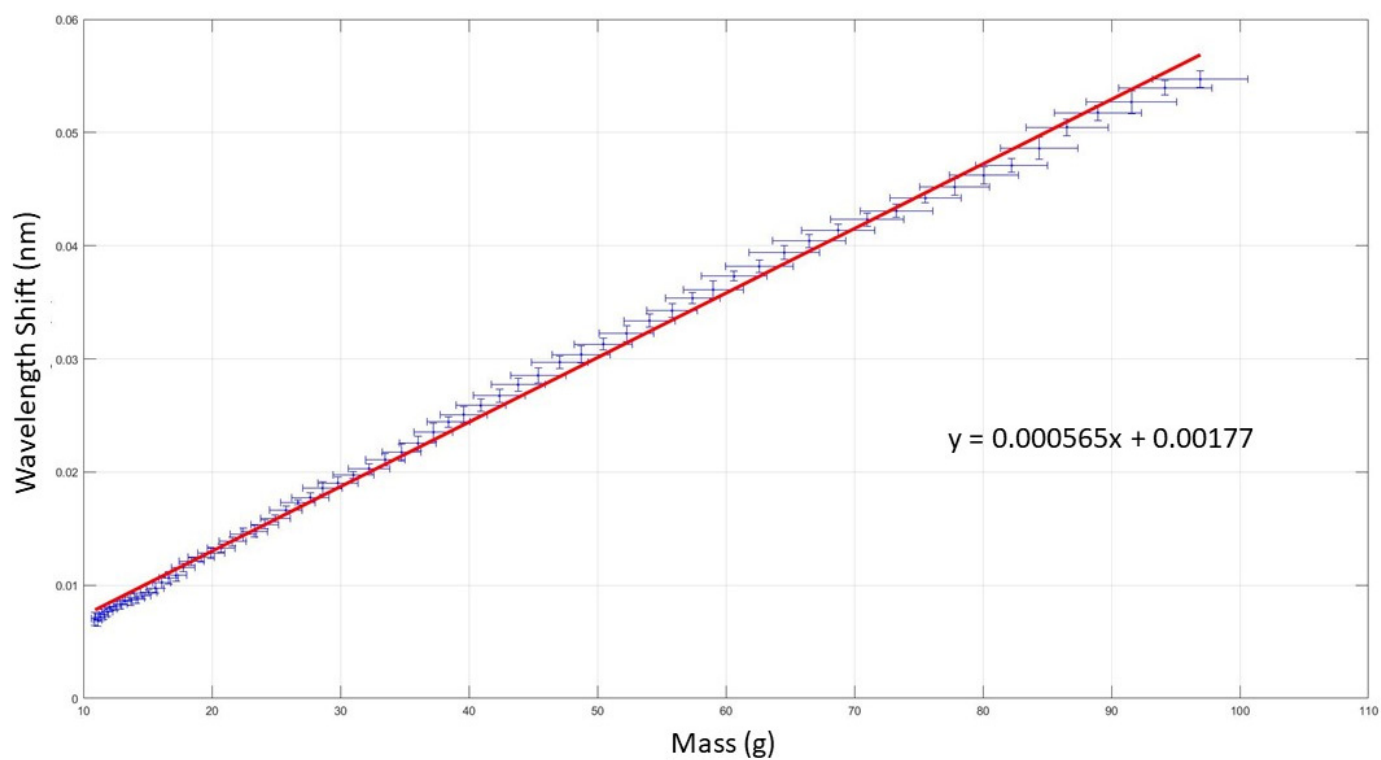

Figure S7 Calibration Data 8

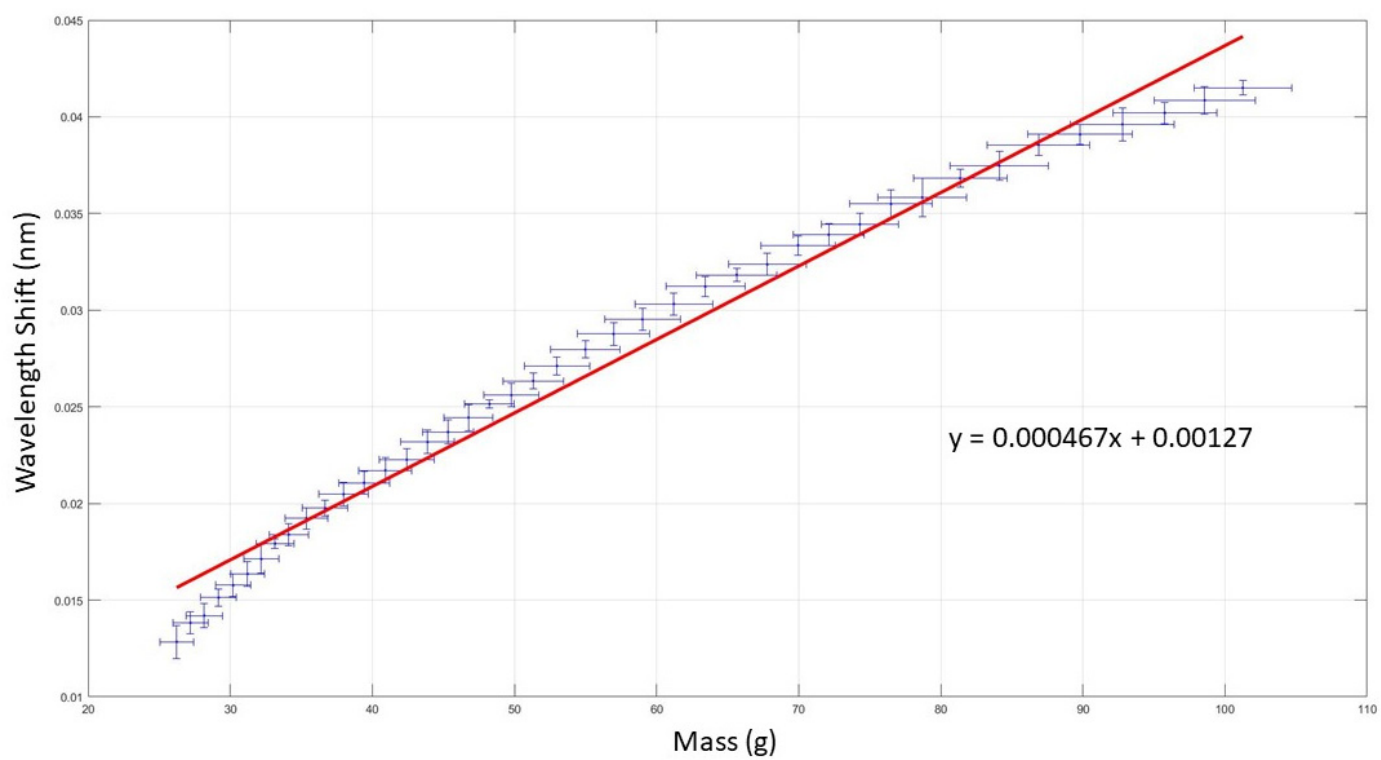

Figure S8 Calibration Data 9

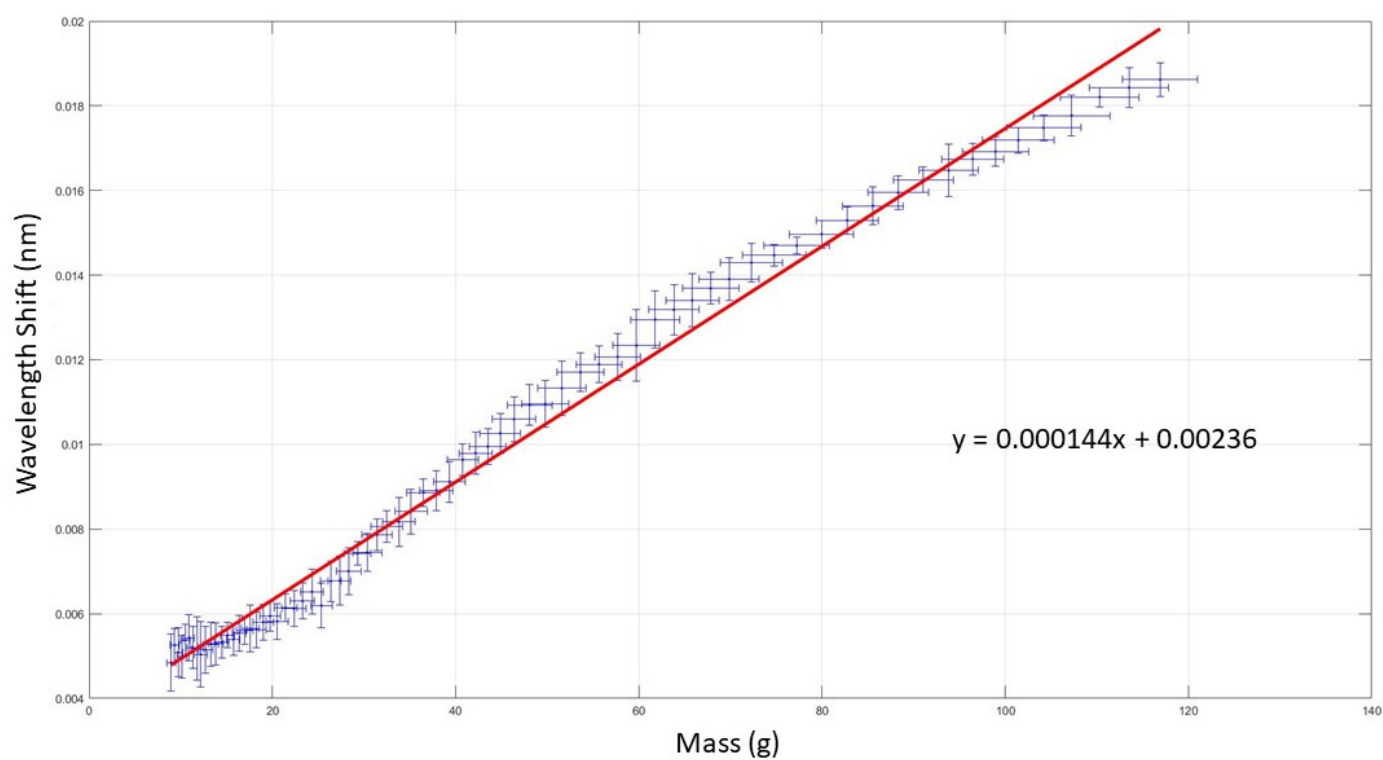

Figure S9 Calibration Data 10

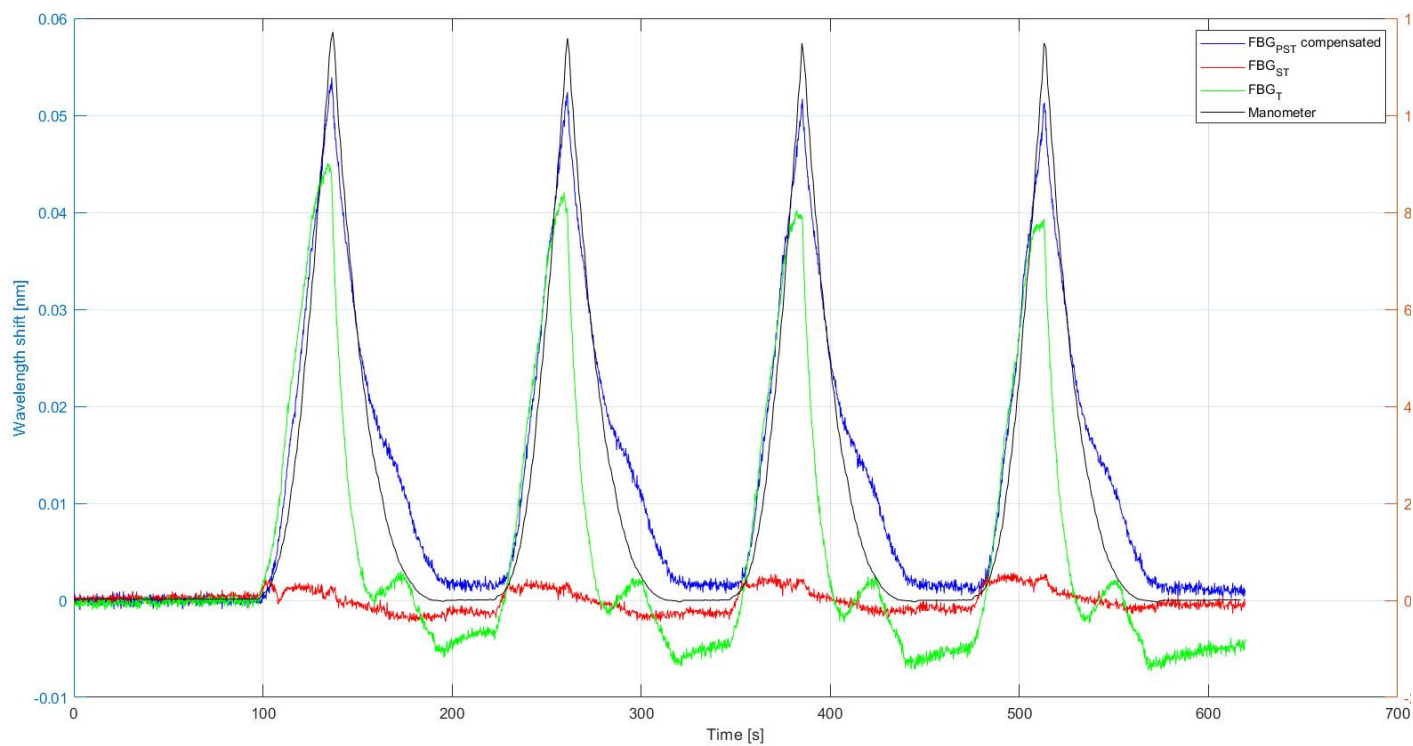

Figure S20 Pressure Cuff Data 2

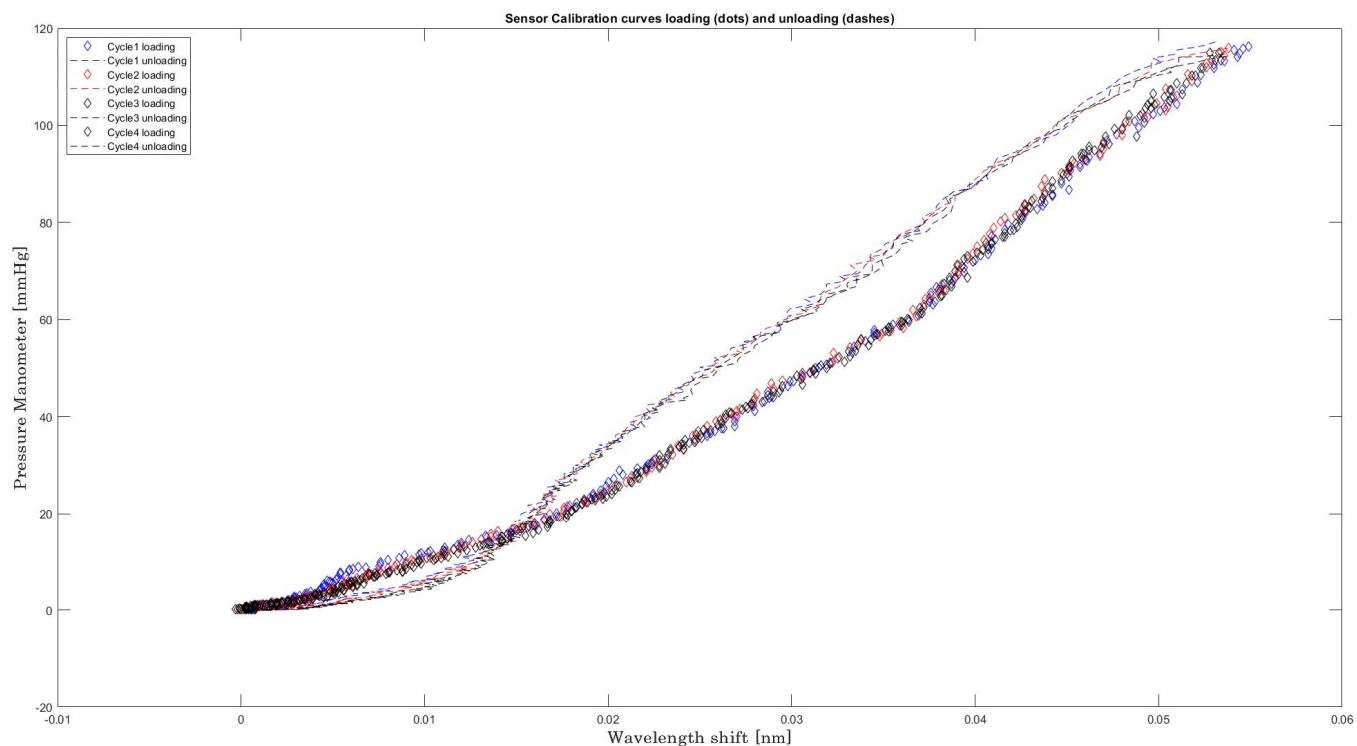

Figure S31 Pressure Cuff Load and Unload Data 2

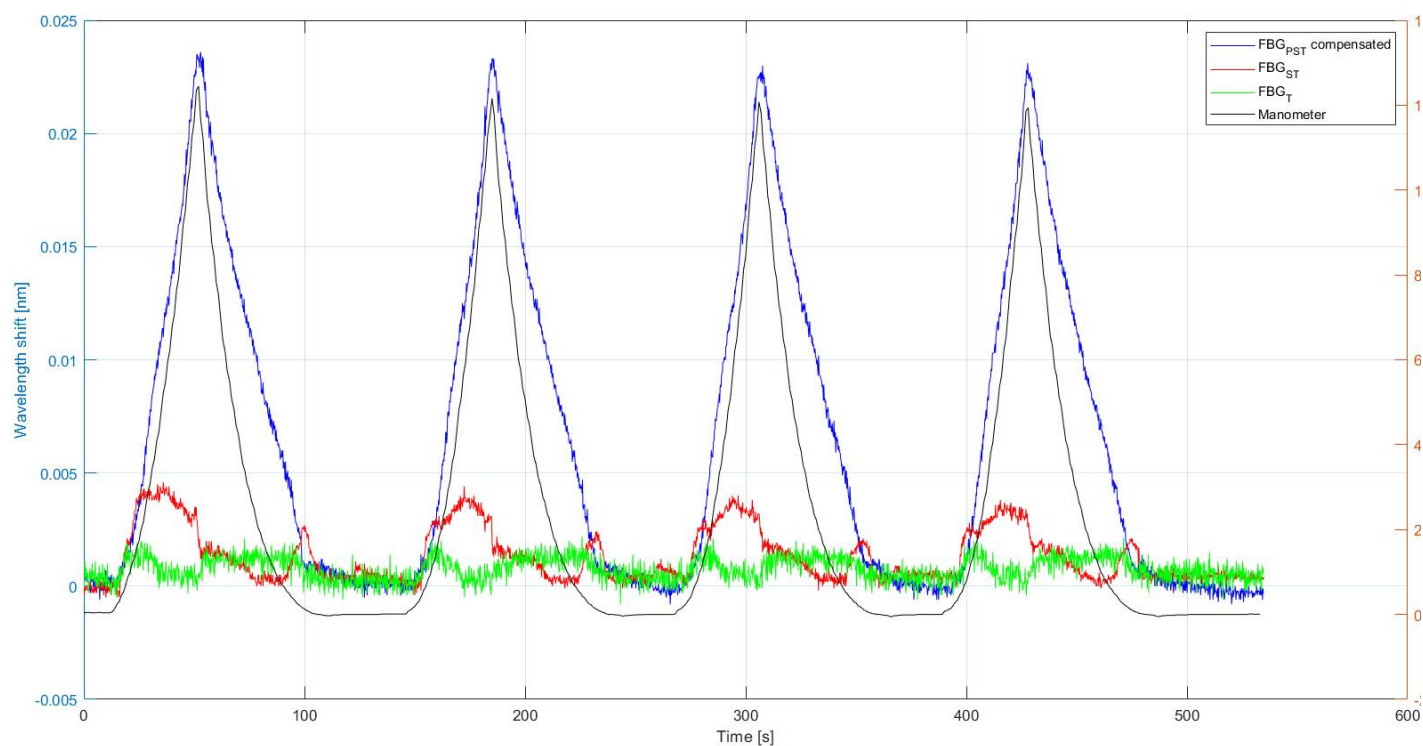

Figure S42 Pressure Cuff Data 3



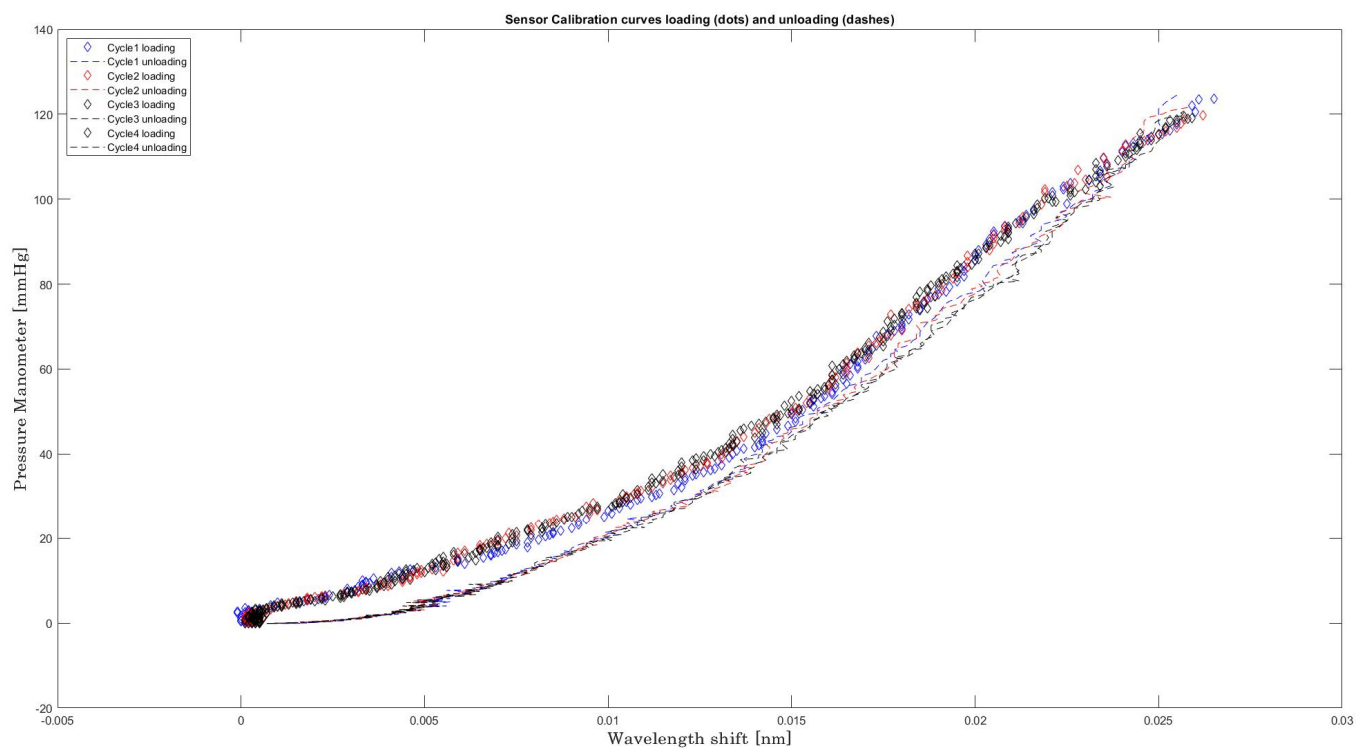

Figure S53 Pressure Cuff Load and Unload Data 3

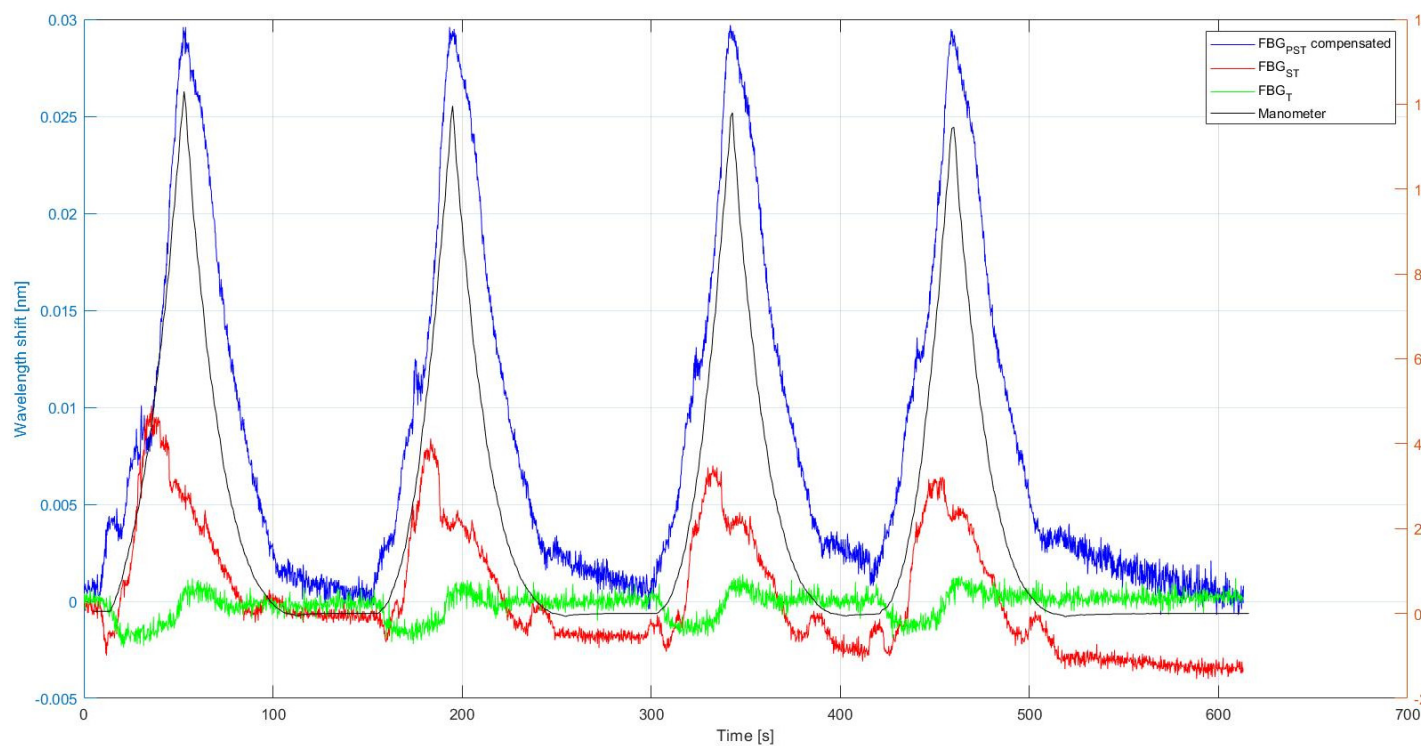

Figure S64 Pressure Cuff Data 4



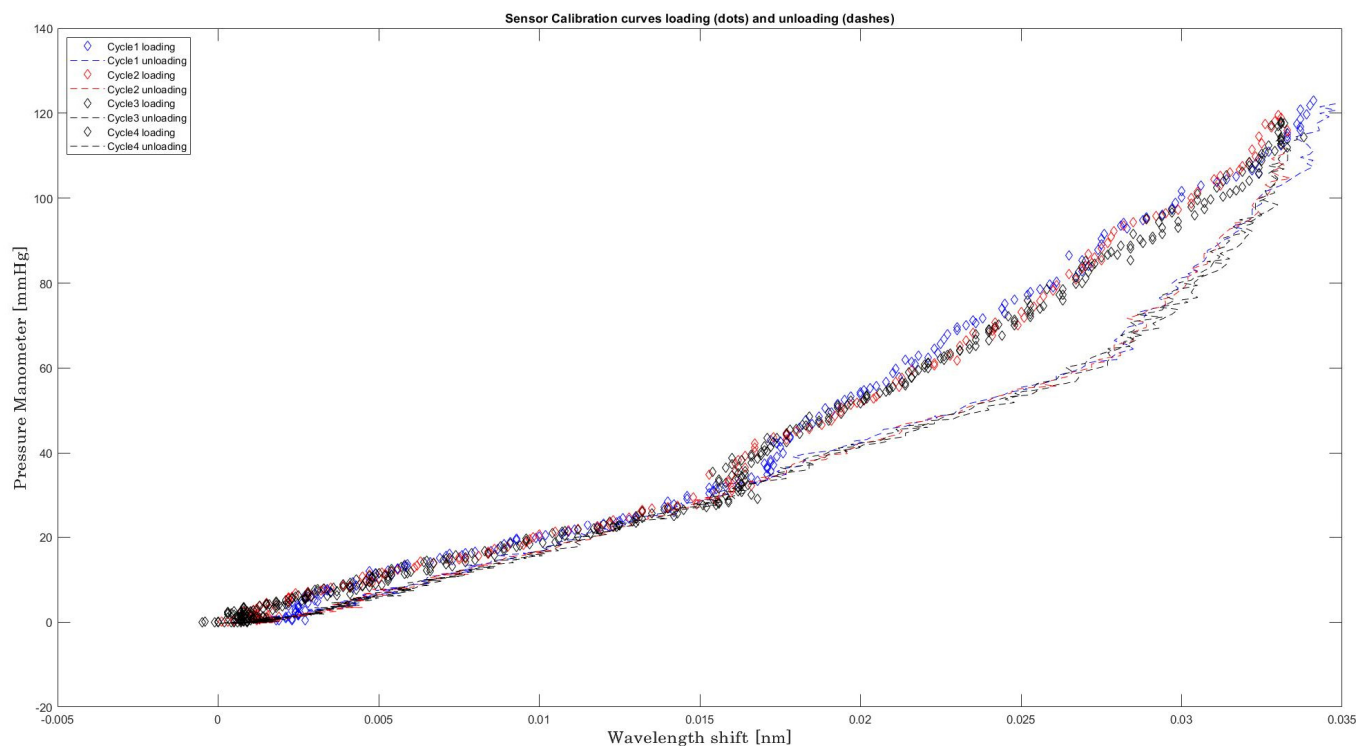

Figure S75 Pressure Cuff Load and Unload Data 4

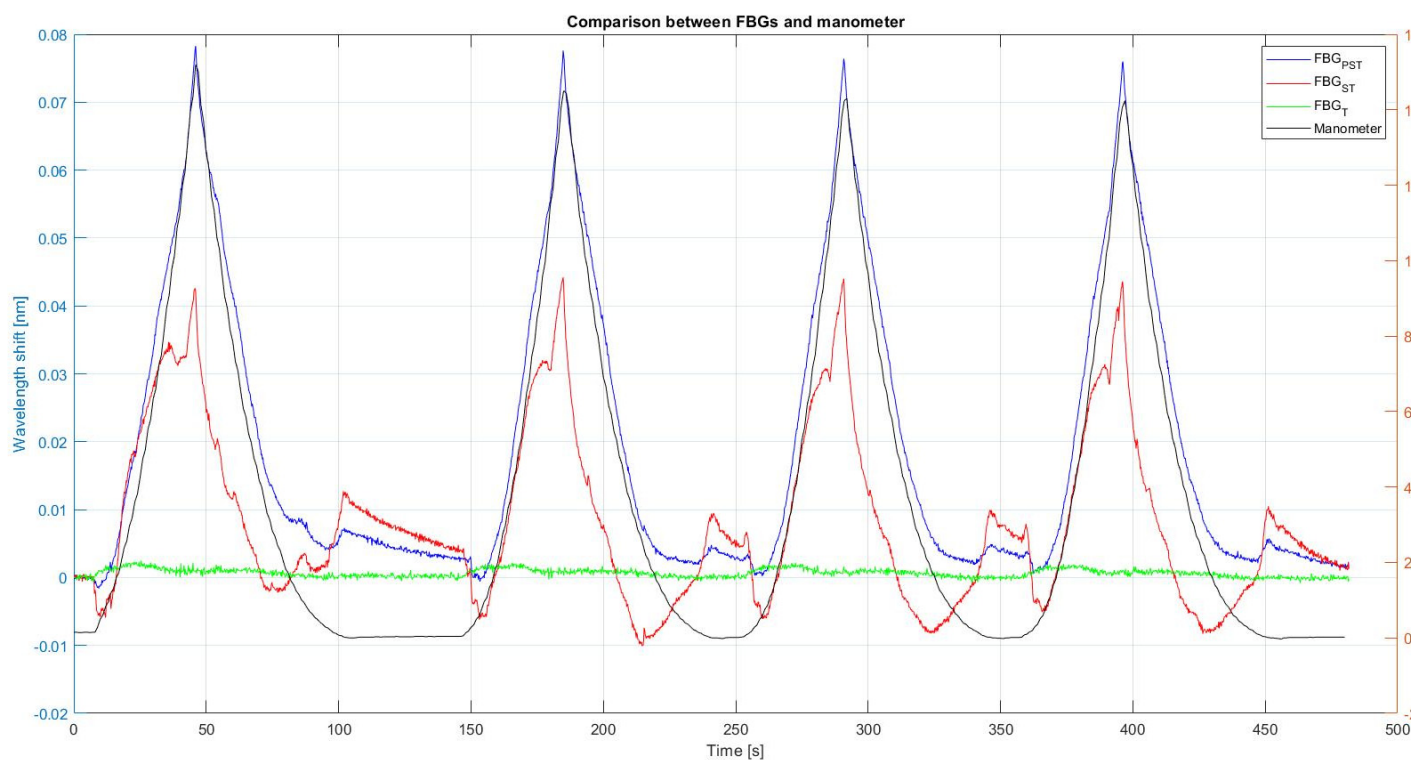

Figure S86 Pressure Cuff Data 5

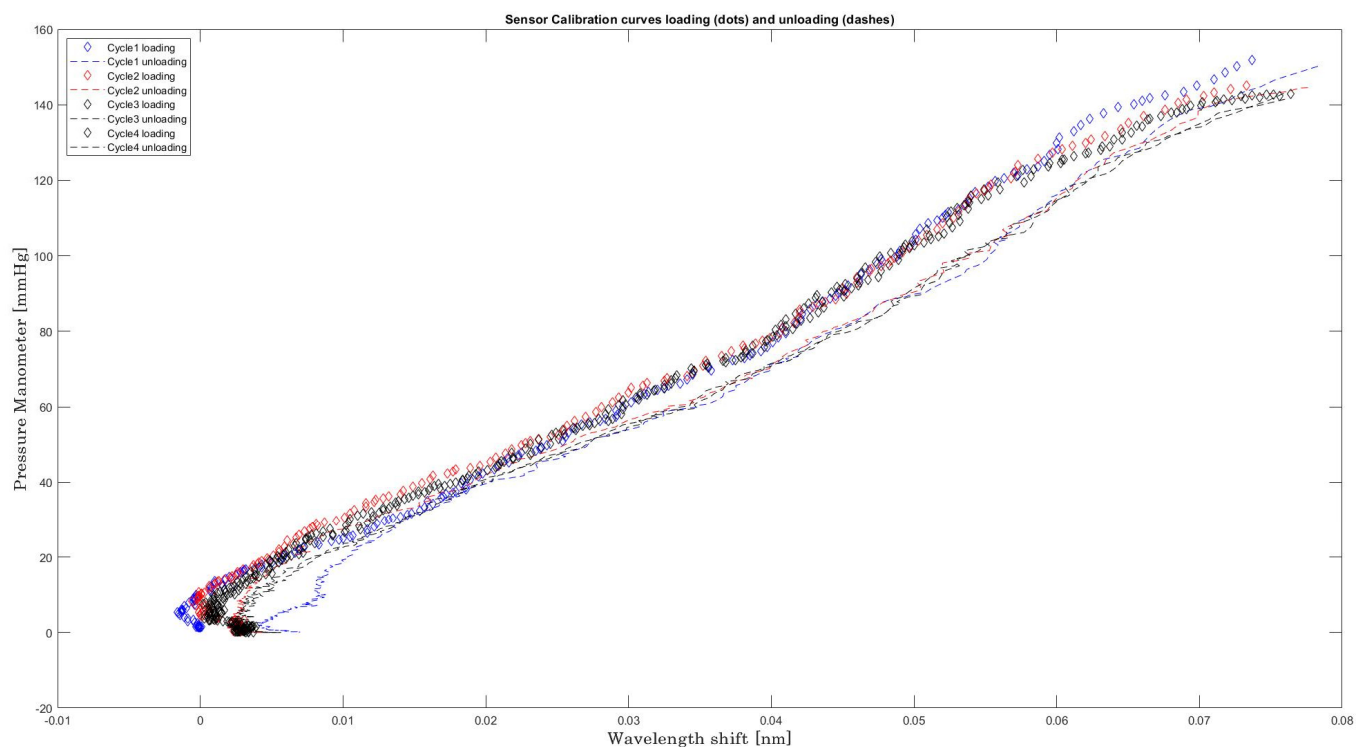

Figure S97 Pressure Cuff Load and Unload Data 5

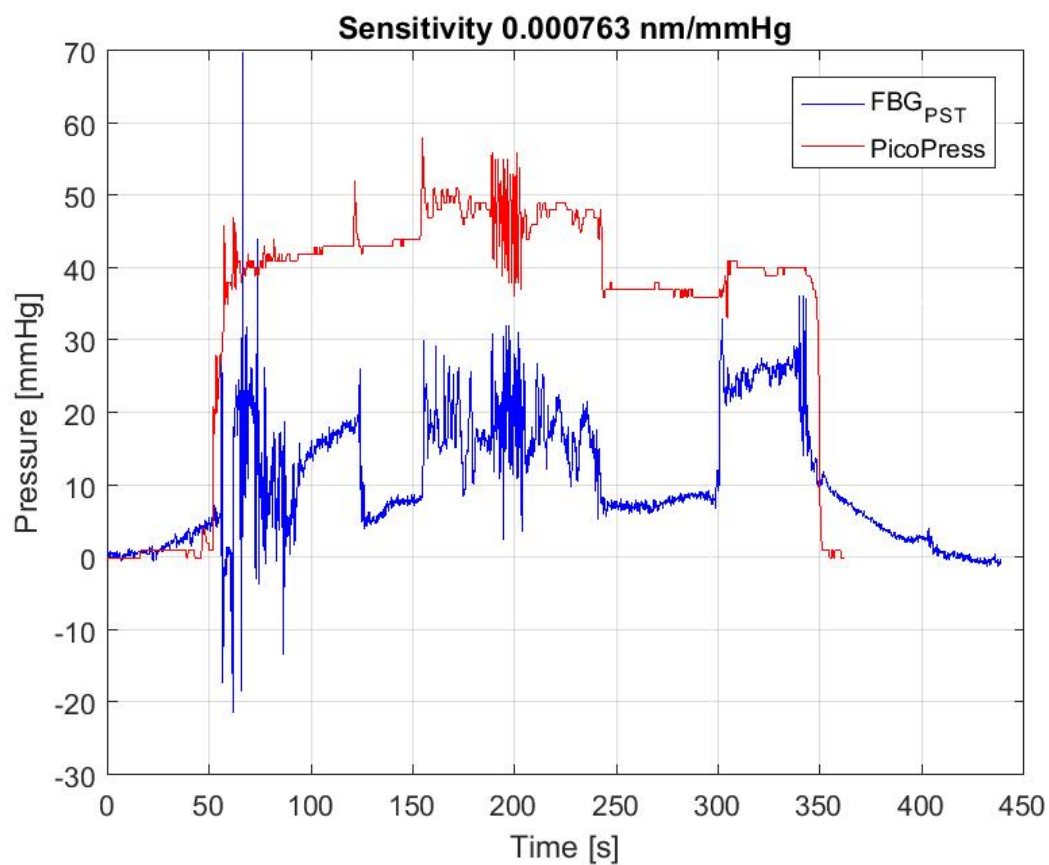

Figure S108 Wrapping Data 2

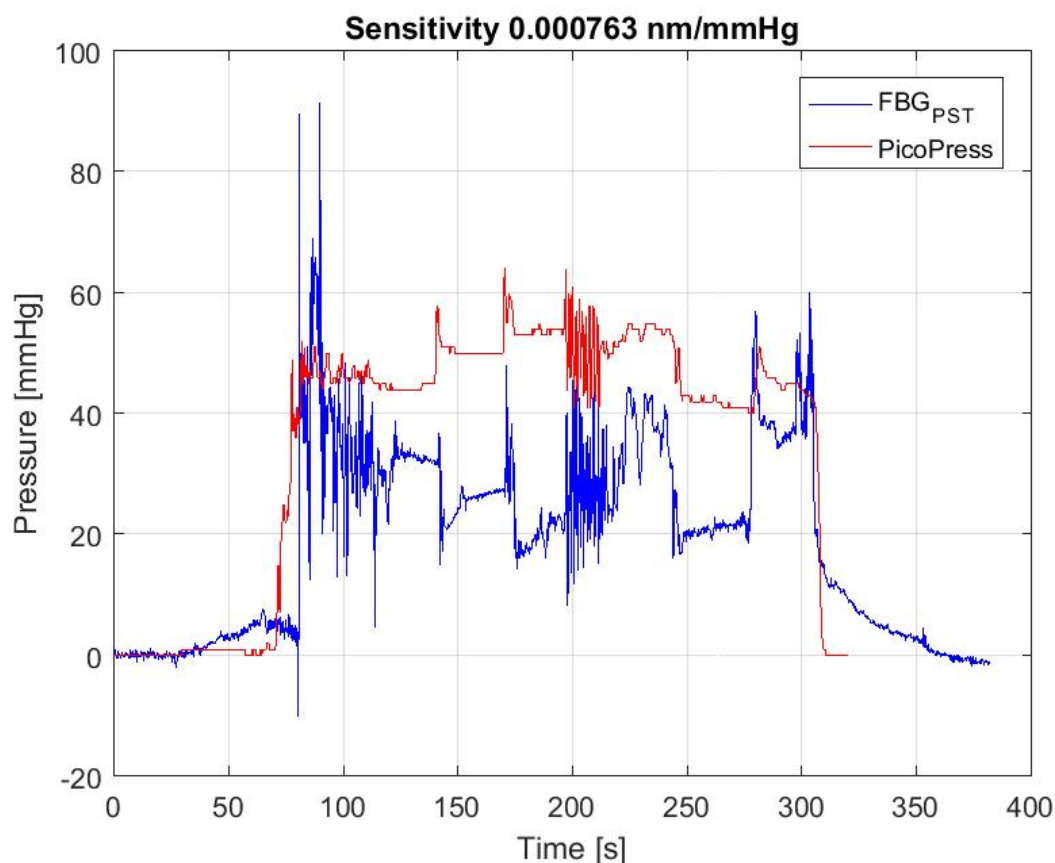

Figure S119 Wrapping Data 3

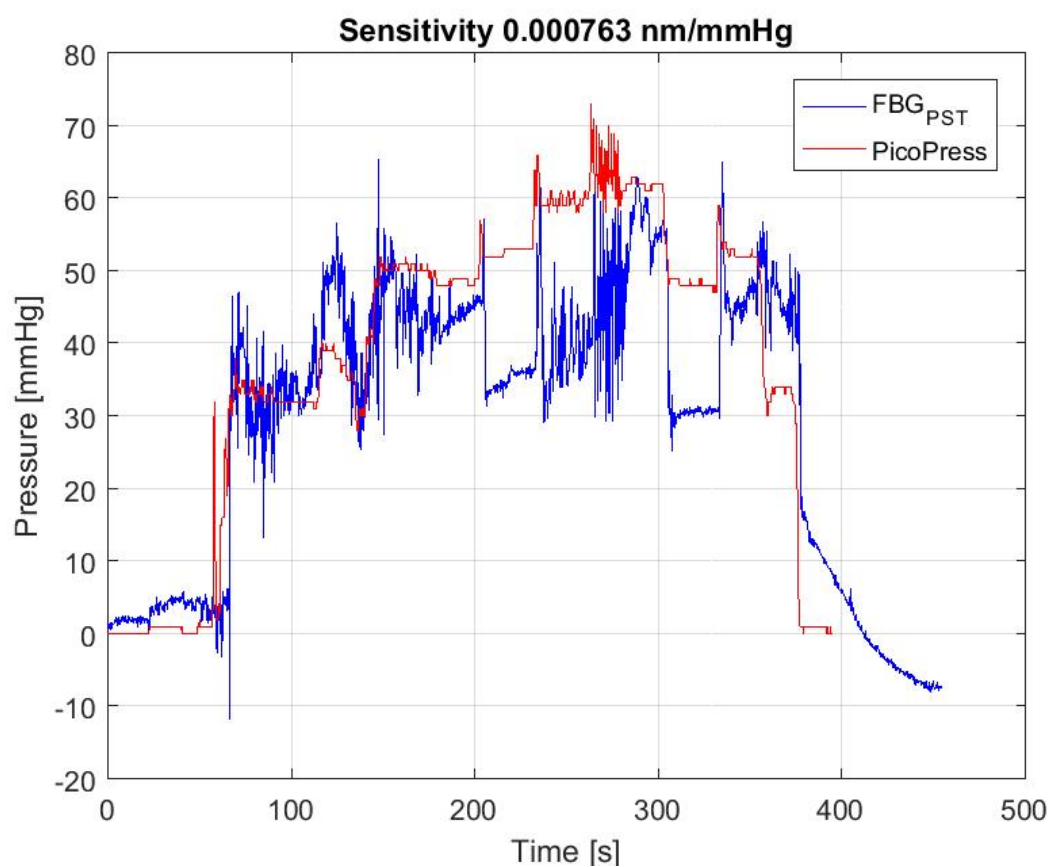

Figure S20 Wrapping Data 4

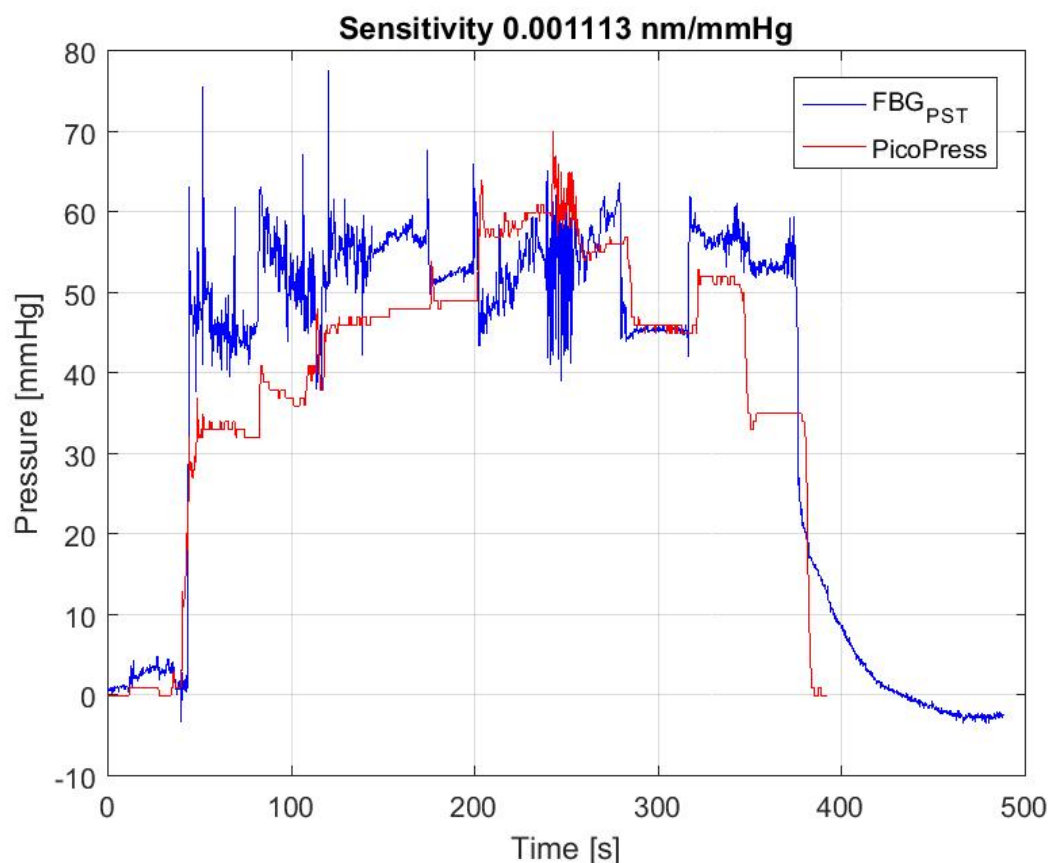

Figure S21 Wrapping Data 5

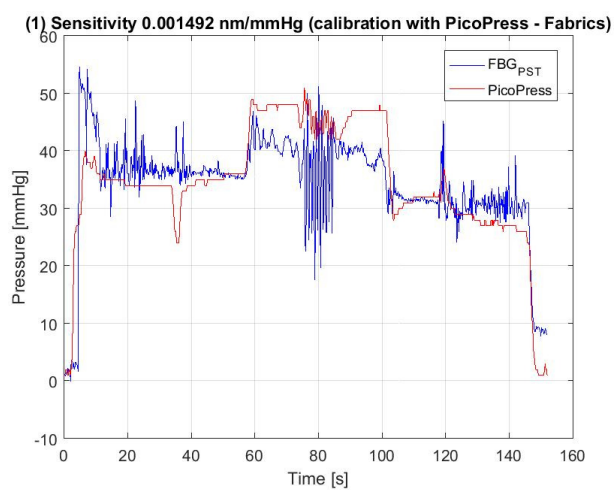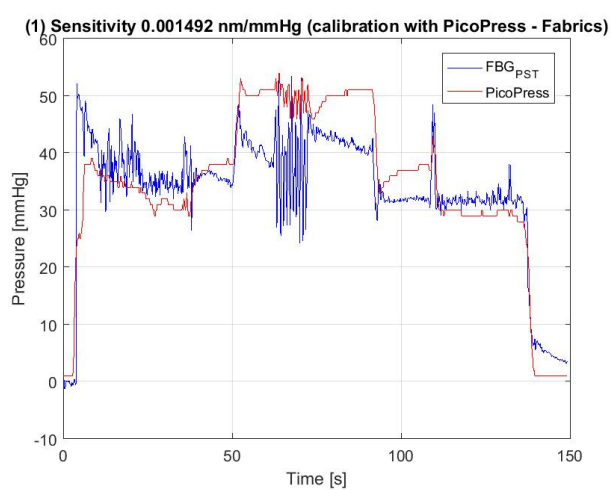

Figure S22 Wrapping Data repeated with the same sensor
